# Supplementary material for: Impact of serum interleukin 22 as a biomarker for the differential use of molecular targeted drugs in psoriatic arthritis: A retrospective study
Source: Research Square preprint supplement (doi:10.21203/rs.3.rs-1265931/v1), 2022-01-19
Supplement: Supplementary file 3 [file 1dc3e333a978c3867ecb2a3f.docx]

**Supplementary Table S6. Comparison of baseline characteristics between IL-22 high and low group in IL-17-i treated group**

| **Variables** | **IL-22 low (n=10)** | **IL-22 high (n= 13)** | **p-value** |
| --- | --- | --- | --- |
| **Age (years)** | 44.1±14.0 | 53.2±16.4 | 0.1448 |
| **Male, n (%)** | 8(80) | 6(46.2) | 0.1968 |
| **Disease Duration (months)** |  |  |  |
| **PSO (month)** | 209(41, 345) | 72(33, 171) | 0.2507 |
| **PsA (month)** | 34(17.2, 49.2) | 32(5.5, 96) | 0.9258 |
| **Bio naive** | 8(80) | 6 (46.1) | 0.1968 |
| **Concomitant MTX use** | 9(90) | 5(38.5) | **0.0288*** |
| **TJC** | 6(3.75, 8.5) | 3(1, 9.5) | 0.4357 |
| **SJC** | 3(2, 8.25) | 3(0, 5.5) | 0.3640 |
| **CRP (mg/dl)** | 0.44(0.18, 1.57) | 0.62(0.06, 1.71) | 0.5350 |
| **DAPSA** | 21.5(12.0, 36.6) | 19.7(13.2, 32.4) | 0.9013 |
| **PASI** | 1.15(0.55, 6) | 2(0.3, 13.6) | 0.4187 |

Data are expressed as mean ± standard deviation, median (interquartile range [IQR]) or number (%).

TNF-i: TNF inhibitors; IL-17-i: IL-17-inhibitors; TJC: tender joint counts 68; SJC: swollen joint counts 66; DAPSA, disease activity in psoriatic arthritis; PASI: psoriasis area and severity index *p<0.05, by Mann–Whitney U test or chi-square test
