# Supplementary material for: Impact of serum interleukin 22 as a biomarker for the differential use of molecular targeted drugs in psoriatic arthritis: A retrospective study
Source: Research Square preprint supplement (doi:10.21203/rs.3.rs-1265931/v1), 2022-01-19
Supplement: Supplementary file 6 [file 93b1de36ce26199e124a1fb1.docx]

**Supplementary Table S2. One year treatment effectiveness of bDMARDS in patients in cohort 1 (n=47)**

| **Variables** | **BL** | **M12** | **p** |
| --- | --- | --- | --- |
| **Bio naive** | 33(70.0) |  |  |
| **Concomitant MTX use** | 23(48.9) |  |  |
| **bDMARDS initiated** |  |  |  |
| **IL-17-i** | 23(48.9) |  |  |
| **TNF-i** | 24(51.1) |  |  |
| **Disease activity** |  |  |  |
| **TJC** | 6(2, 9) | 0(0, 1) | ***<0.001** |
| **SJC** | 4(1, 6) | 0(0, 0) | ***<0.001** |
| **CRP (mg/dl)** | 0.53(0.07, 1.75) | 0.14(0.04, 0.28) | ***0.001** |
| **DAPSA** | 21.9(13.3, 32.3) | 3.9(1.3, 9.9) | ***<0.001** |
| **DAPSA-REM, n (%)** |  | 24 (51.3) |  |
| **Minimal disease activity, n (%)** |  | 33 (70.2) |  |
| **PASI** | 2(0.6, 6.4) | 0(0. 0.8) | ***<0.001** |
| **PASI90** |  | 22/40 (55.0 %) |  |

Data are expressed as mean ± standard deviation, median (interquartile range [IQR]), or number (%).

TNF-i, TNF inhibitors; IL-17-i, IL-17-inhibitors; DM, diabetes mellitus; DL, dyslipidemia; TJC, tender joint count 68; SJC, swollen joint counts 66; DAPSA, disease activity in psoriatic arthritis; REM, remission; PASI, psoriasis area and severity index *p<0.05, Wilcoxon signed rank test
