# Supplementary material for: Impact of serum interleukin 22 as a biomarker for the differential use of molecular targeted drugs in psoriatic arthritis: A retrospective study
Source: Research Square preprint supplement (doi:10.21203/rs.3.rs-1265931/v1), 2022-01-19
Supplement: Supplementary file 7 [file 94cb3b379c4ed4cc2c33b0d0.docx]

**Supplementary Table S5. Comparison of baseline characteristics between IL-22 high and low group in TNF-i treated group**

| **Variables** | **IL-22 low(n=12)** | **IL-22 high(n=12)** | **p-value** |
| --- | --- | --- | --- |
| **Age (years)** | 57.2±12.0 | 57.3±17.2 | 0.4526 |
| **Male, n (%)** | 4(33.3) | 6(50) | 0.6802 |
| **Disease Duration (months)** |  |  |  |
| **PSO (month)** | 228(7.75, 291.7) | 115.5(27, 318) | 0.8852 |
| **PsA (month)** | 46(17.7, 124.5) | 48(12.7, 217.5) | 0.9080 |
| **Bio naive** | 10(83.3) | 9 (75.0) | 1.0000 |
| **Concomitant MTX use** | 6(50) | 5(41.6) | 1.0000 |
| **TJC** | 5(2, 14) | 5.5(3.5, 7) | 0.8391 |
| **SJC** | 6(1.5, 14.5) | 4(1, 6) | 0.1624 |
| **CRP (mg/dl)** | 0.14(0.02, 0.74) | 1.01(0.12, 2.19) | 0.0884 |
| **DAPSA** | 23.9(9.0, 42.0) | 21.2(16.2, 26.0) | 0.6033 |
| **PASI** | 1.8(0.65, 7.8) | 3.8(1.07, 5.77) | 0.4527 |

Data are expressed as mean ± standard deviation, median (interquartile range [IQR]) or number (%).

TNF-i: TNF inhibitors; IL-17-i: IL-17-inhibitors; TJC: tender joint counts 68; SJC: swollen joint counts 66; DAPSA, disease activity in psoriatic arthritis; PASI: psoriasis area and severity index *p<0.05, by Mann–Whitney U test or chi-square test
